# Supplementary material for: Superior charge storage performance of WS2 quantum dots in a flexible solid state supercapacitor
Source: Royal Society of Chemistry journal article supplement (doi:10.1039/c7nj03869k), 2018-01-01
Supplement: c7nj03869k1.pdf [file c7nj03869k1.pdf]

## Supporting Information (SI)

### Superior Charge Storage Performance of WS<sub>2</sub> Quantum dots in a Flexible Solid State Supercapacitor

**Arup Ghorai,<sup>a</sup> Anupam Midya<sup>a\*</sup> and Samit K Ray<sup>b,c</sup>**

<sup>a</sup>*School of Nanoscience and Technology, Indian Institute of Technology Kharagpur, Kharagpur 721302, India,*

<sup>b</sup>*Department of Physics, Indian Institute of Technology Kharagpur, Kharagpur 721302*

<sup>c</sup>*S. N. Bose National Centre for Basic Sciences, Kolkata 700 106, India*

#### Equation- 1: Bohr's Equation:

$$R_B = \frac{\hbar^2 E}{e^2} \left( \frac{1}{m_e^*} + \frac{1}{m_h^*} \right)$$

Where  $\hbar$  is the reduced Planck's constant,  $m_e^*$  and  $m_h^*$  are the effective masses of electrons and holes, respectively,  $e$  is the electronic charge, and  $\varepsilon$  is the relative permittivity of WS<sub>2</sub>. The carrier effective masses are taken as  $m_e^* = 0.39m_o$  and  $m_h^* = 0.40m_o$  from the literature, where  $m_o$  is the electronic rest mass<sup>1</sup>. The dielectric permittivity of WS<sub>2</sub> has been reported to be strongly dependent on the number of layers<sup>2</sup>.

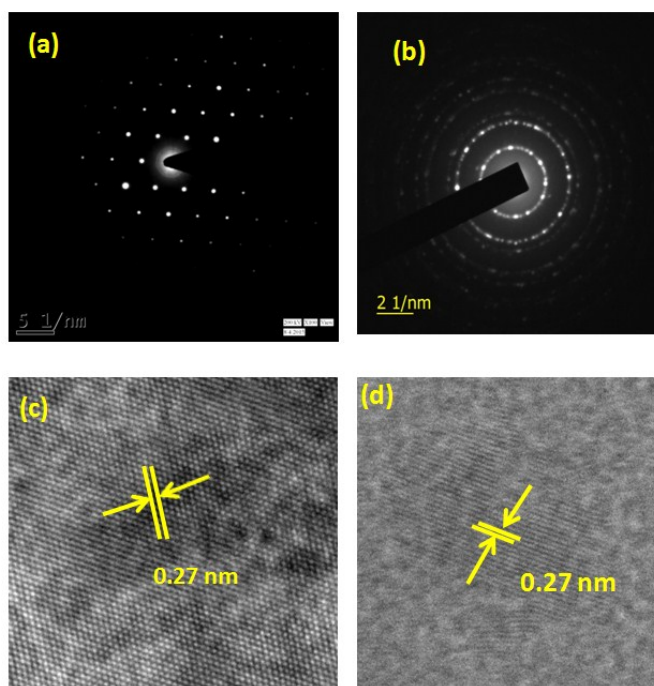

**Figure S1:** (a) Typical selected area electron diffraction pattern of WS<sub>2</sub> (a)NS and (b)QD (b); high resolution TEM image of WS<sub>2</sub> (c)NS and (d)QD.

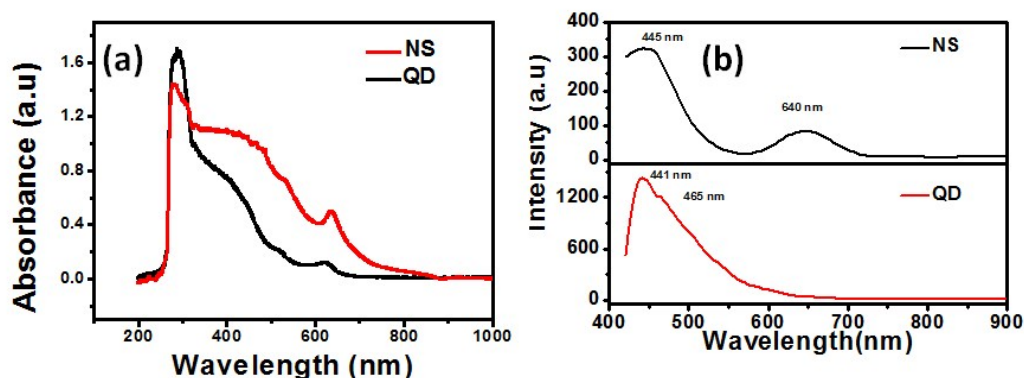

**Figure S2:** Comparison of (a) UV-Vis spectra and (b) photoluminescence spectra of NS and QD.

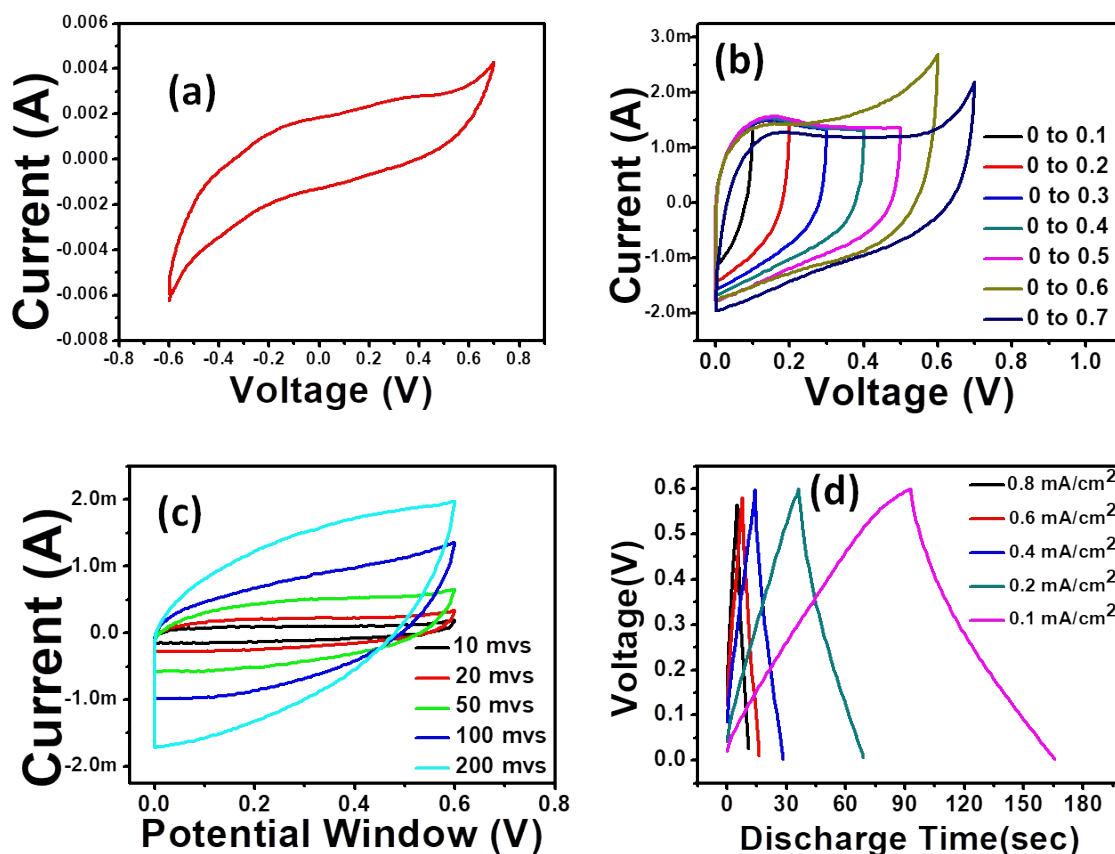

**Figure S3:** CV curve of the QD-based device in three electrode system using H<sub>3</sub>OP<sub>4</sub>-PVA at a scan rate of 10 mV/s; (b) cyclic voltammogram of the solid state QD-based device at

different voltage window; (c) cyclic voltammogram and (d) charge discharge of the NS based solid state device under the same condition in which QD-base device is measured.

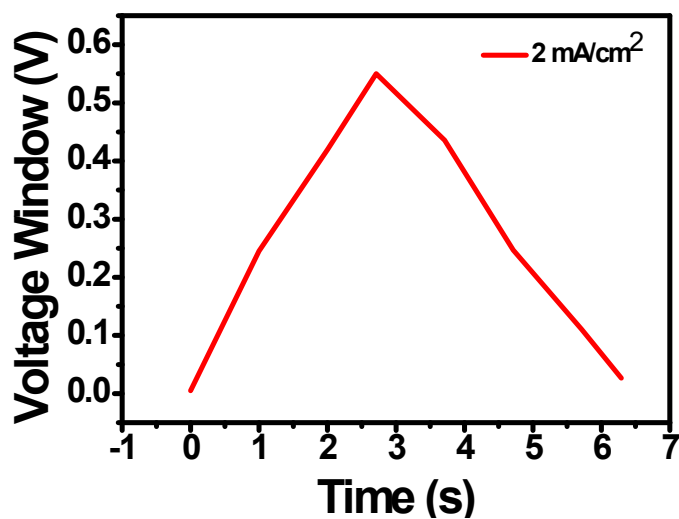

**Figure S4:** Charge-discharge of WS<sub>2</sub> QD-based device at a current density of 2mA/cm<sup>2</sup>.

- 
1. A. Kormányos, V. Zólyomi, N. D. Drummond, and G. Burkard, *Phys. Rev. X*, 2014, **4**, 011034.
  2. A. Kumar, P. K. Ahluwalia, *Physica B*, 2012, **407**, 4627–4634.
